# Supplementary material
Source: PubMed Central journal article supplement (PMC5592729)
Supplement: NIHMS902994-supplement-Table1.pdf [file NIHMS902994-supplement-Table1.pdf]

**Supplemental Table 1. Hematologic abnormalities in stem cell donors.**

| Donor abnormality               | Age (years) | Gender | Platelet count (K/ $\mu$ l) | WBC (K/ $\mu$ l) | Hgb (g/dL) | Hct (%) | MCV (fL) | MCH (pg) | MCHC (g/dL) | RDW (%) | Day 1 PB CD34+ counts (median; cells/ $\mu$ L) | Poor mobilizer | DNA available for sequencing | Clinical notes                |
|---------------------------------|-------------|--------|-----------------------------|------------------|------------|---------|----------|----------|-------------|---------|------------------------------------------------|----------------|------------------------------|-------------------------------|
| high MCV                        | 63          | female | 383                         | 5.5              | 11.7       | 33.7    | 101      | 35       | 34.7        | 16.7    | 3.6                                            | yes            | no                           |                               |
| high MCV                        | 57          | male   | 176                         | 6.7              | 13.7       | 39.4    | 102.2    | 35.5     | 34.7        | 12.5    | 90.5                                           | no             | na                           |                               |
| high MCV                        | 53          | male   | 200                         | 5.4              | 12.8       | 37.6    | 102.8    | 35       | 34.1        | 15.3    | 161.1                                          | no             | na                           |                               |
| high MCV                        | 42          | female | 262                         | 9.8              | 13.9       | 42.9    | 106.2    | 34.4     | 32.4        | 14.8    | 35.2                                           | yes            | yes                          | chronic ETOH use              |
| high MCV and low platelet count | 64          | male   | 136                         | 5.1              | 13.7       | 40.7    | 107.6    | 36.2     | 33.7        | 12.8    | 2.0                                            | yes            | yes                          | germline <i>TERT</i> mutation |
| low platelet count              | 70          | male   | 109                         | 4.2              | 14.3       | 40.7    | 85.8     | 30.1     | 35.1        | 13.5    | 80.7                                           | no             | na                           |                               |
| low platelet count              | 56          | male   | 121                         | 7.7              | 15.6       | 45.8    | 86.8     | 29.5     | 33.9        | 16      | 67.3                                           | no             | na                           |                               |
| low platelet count              | 67          | male   | 139                         | 5.6              | 16.1       | 45.9    | 90.8     | 31.8     | 35          | 14.4    | 43.5                                           | yes            | yes                          | CHIP                          |
| low platelet count              | 29          | male   | 149                         | 3.5              | 14.9       | 43.4    | 83.8     | 28.8     | 34.3        | 12.6    | 51.8                                           | yes            | no                           |                               |
| low WBC                         | 55          | male   | 166                         | 3.1              | 14.7       | 43.7    | 90.8     | 30.8     | 33.9        | 12.4    | 5.7                                            | yes            | no                           |                               |
