# Supplementary material
Source: PubMed Central journal article supplement (PMC5592729)
Supplement: NIHMS902994-supplement-Table2.pdf [file NIHMS902994-supplement-Table2.pdf]

Supplemental Table 2. Hematologic parameters in poor mobilizing donors.

| Age (years) | Gender | Platelet count (K/ $\mu$ l) | WBC (K/ $\mu$ l) | Hgb (g/dL) | Hct (%) | MCV (fL) | MCH (pg) | MCHC (g/dL) | RDW (%) | Day 1 PB CD34+ counts (median; cells/ $\mu$ L) | Poor mobilizer | sequenced | mutation                      |
|-------------|--------|-----------------------------|------------------|------------|---------|----------|----------|-------------|---------|------------------------------------------------|----------------|-----------|-------------------------------|
| 45          | 1      | 275                         | 8.5              | 16.1       | 47.2    | 87.9     | 30       | 34.1        | 14      | 42.5                                           | 1              | yes       | no                            |
| 67          | 2      | 267                         | 9.2              | 12.9       | 39      | 90.7     | 30       | 33.1        | 13.4    | 7.8                                            | 1              | yes       | no                            |
| 63          | 1      | 200                         | 6.2              | 14.5       | 42.6    | 93       | 31.6     | 34          | 12.9    | 51.59                                          | 1              | yes       | no                            |
| 71          | 1      | 156                         | 4.9              | 15.1       | 44.3    | 98.4     | 33.5     | 34          | 12.8    | 12.36                                          | 1              | yes       | no                            |
| 43          | 2      | 201                         | 5.5              | 14.7       | 43.6    | 97.4     | 32.8     | 33.7        | 14.3    | 29.8                                           | 1              | yes       | no                            |
| 42          | 2      | 262                         | 9.8              | 13.9       | 42.9    | 106.2    | 34.4     | 32.4        | 14.8    | 35.2                                           | 1              | yes       | no                            |
| 33          | 1      | 192                         | 7                | 14.8       | 42.7    | 85.3     | 29.5     | 34.6        | 12.8    | 46.6                                           | 1              | yes       | no                            |
| 52          | 2      | 418                         | 8.2              | 12.1       | 36.7    | 83.7     | 28.5     | 34          | 14.5    | 15.2                                           | 1              | yes       | no                            |
| 25          | 1      | 262                         | 5.2              | 15.8       | 46.1    | 92.2     | 31.6     | 34.3        | 12.4    | 46.5                                           | 1              | yes       | no                            |
| 54          | 1      | 251                         | 7.9              | 16.2       | 47.1    | 95.2     | 32.8     | 34.4        | 13.1    | 29.9                                           | 1              | yes       | no                            |
| 14          | 1      | 189                         | 5.2              | 15.4       | 44.4    | 88.7     | 30.7     | 34.6        | 12.4    | 44.52                                          | 1              | yes       | no                            |
| 72          | 2      | 305                         | 8.7              | 13.7       | 42.4    | 81.9     | 26.5     | 32.3        | 15      | 35.4                                           | 1              | yes       | no                            |
| 46          | 1      | 222                         | 6.7              | 15.8       | 47      | 92.6     | 31.2     | 33.7        | 13.3    | 44.1                                           | 1              | yes       | no                            |
| 70          | 1      | 191                         | 4.9              | 12.8       | 37.6    | 88.3     | 30       | 34          | 14.6    | 51.48                                          | 1              | yes       | no                            |
| 73          | 2      | 219                         | 4.9              | 12.3       | 35.9    | 93       | 31.8     | 34.3        | 12.5    | 42.9                                           | 1              | yes       | no                            |
| 50          | 2      | 240                         | 3.8              | 12.4       | 36.5    | 88.2     | 30       | 34          | 13      | 21.2                                           | 1              | yes       | no                            |
| 59          | 1      | 294                         | 9.8              | 15.8       | 44.3    | 95.4     | 34       | 35.6        | 12.3    | 41.48                                          | 1              | yes       | no                            |
| 37          | 1      | 171                         | 4                | 15.3       | 43.9    | 88       | 30.6     | 34.8        | 12.9    | 39                                             | 1              | yes       | no                            |
| 61          | 1      | 212                         | 8.2              | 15.9       | 43.9    | 85.7     | 31.1     | 36.2        | 12.2    | 22.8                                           | 1              | yes       | no                            |
| 59          | 1      | 165                         | 8                | 16.3       | 45.7    | 92.4     | 32.9     | 35.7        | 12.9    | 48.3                                           | 1              | yes       | no                            |
| 63          | 2      | 172                         | 6.9              | 15.2       | 44.1    | 96.7     | 33.4     | 34.5        | 12.8    | 53.94                                          | 1              | yes       | no                            |
| 74          | 1      | 202                         | 9.3              | 16.8       | 49.1    | 97.9     | 33.5     | 34.3        | 12.9    | 32.3                                           | 1              | yes       | no                            |
| 43          | 1      | 222                         | 4.5              | 15.7       | 43.8    | 86.9     | 31.2     | 35.8        | 12.2    | 48.4                                           | 1              | yes       | no                            |
| 60          | 2      | 224                         | 8.5              | 13.1       | 38.7    | 90.9     | 30.8     | 33.9        | 13      | 10.2                                           | 1              | yes       | no                            |
| 55          | 1      | 190                         | 8.2              | 14.9       | 41.4    | 88.1     | 31.6     | 35.9        | 14.3    | 31.5                                           | 1              | yes       | no                            |
| 43          | 2      | 348                         | 11.2             | 13.7       | 41.1    | 93.5     | 31.3     | 33.5        | 12.1    | 33.5                                           | 1              | yes       | no                            |
| 64          | 1      | 136                         | 5.1              | 13.7       | 40.7    | 107.6    | 36.2     | 33.7        | 12.8    | 2.0                                            | 1              | yes       | germline <i>TERT</i> mutation |
| 67          | 1      | 139                         | 5.6              | 16.1       | 45.9    | 90.8     | 31.8     | 35          | 14.4    | 43.5                                           | 1              | yes       | CHIP                          |
